# Supplementary material for: Fabrication of a novel whole tissue-engineered intervertebral disc for intervertebral disc regeneration in the porcine lumbar spine
Source: Royal Society of Chemistry journal article supplement (doi:10.1039/c8ra06943c), 2018-01-01

### Electronic Supplementary Information

**Supplementary Fig. S1** The implantation of tissue-engineered IVD into porcine spine: (a) removing the intact disc and inserting tissue-engineered IVD, and (b) fixing the tissue-engineered IVD with titanium plates and screws.

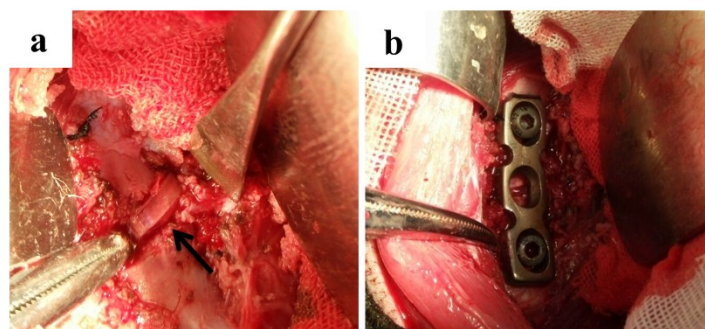

Supplement: c8ra06943c1.pdf [file c8ra06943c1.pdf]
